# Supplementary material
Source: Springer Nature journal article supplement (https://www.springermedizin.de/resource/supplementary/13054_2004_3018_MOESM3_ESM.pdf/9719544)

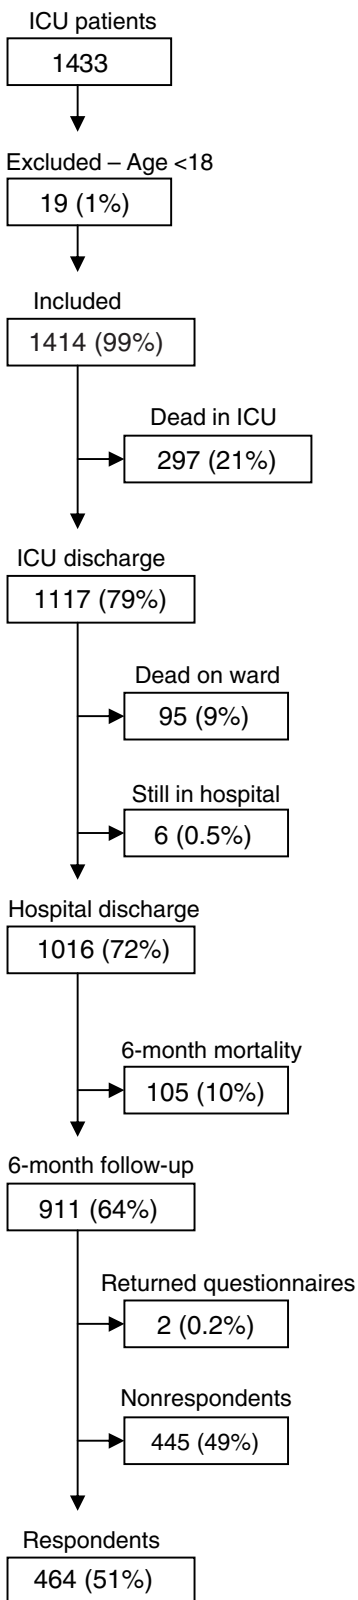

Supplement: MOESM3 [file 9719544]
